# Supplementary material for: The hydrolysis of phenyl trifluoroacetate in AOT/n-heptane RMs as a sensor of the encapsulated water structure
Source: Royal Society of Chemistry journal article supplement (doi:10.1039/c5ra03532e), 2015-01-01
Supplement: c5ra03532e1.pdf [file c5ra03532e1.pdf]

## Supporting information

The hydrolysis of phenyl trifluoroacetate in AOT/*n*-heptane RMs as a sensor of the encapsulated water structure

O. Fernando Silva<sup>\*a</sup>, Rita H. de Rossi<sup>a</sup>, N. Mariano Correa<sup>\*b</sup>

<sup>a</sup>Instituto de Investigaciones en Físico-Química de Córdoba, INFIQC-CONICET. Facultad de Ciencias Químicas. Departamento de Química Orgánica. Universidad Nacional de Córdoba. Ciudad Universitaria. (X5000HUA) Córdoba. Argentina. <sup>b</sup>Departamento de Química. Universidad Nacional de Río Cuarto. Agencia Postal # 3. (X5804ALH) Río Cuarto, Argentina

|                         |    |
|-------------------------|----|
| Figure S1.....          | S2 |
| Figure S2.....          | S2 |
| Deduction of Eq. 4..... | S3 |
| Table S1.....           | S4 |
| Figure S3.....          | S4 |

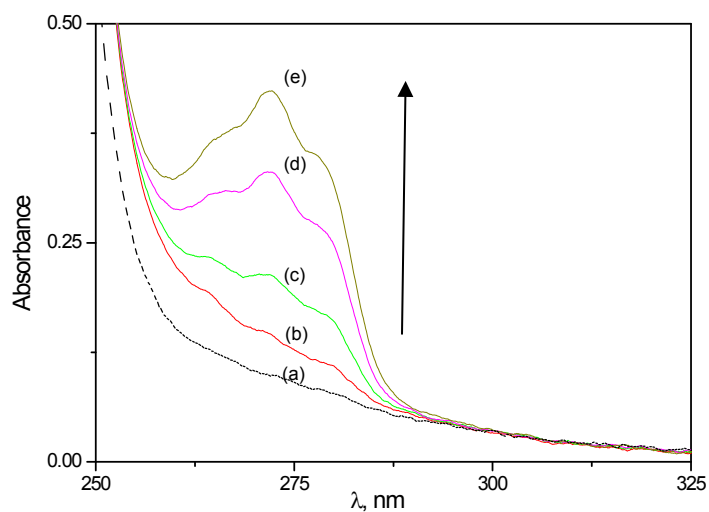

**Figure S1.** Absorption spectra of PFTA in AOT (0.3 M)/*n*-heptane at (a)  $W=0$  and  $W=10$  at (b) 0.5, (c) 23, (d) 93 minutes and (e) 48 hours. The arrow indicates the direction of spectral change over time

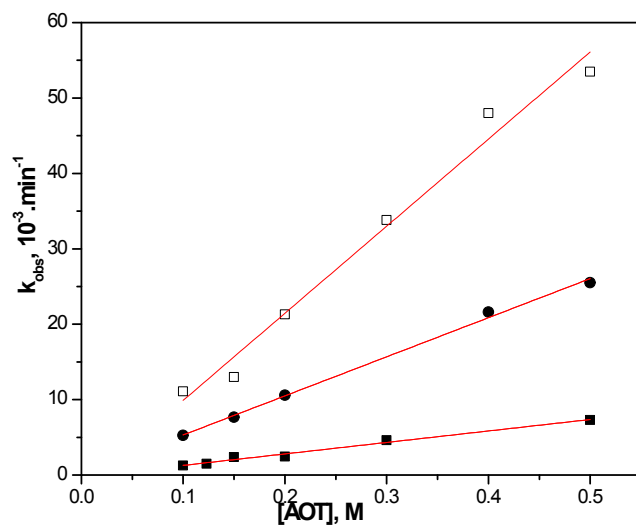

**Figure S2.** Influence of the concentration of AOT on  $k_{\text{obs}}$  in the hydrolysis of PFTA at  $W = 5$  (fill squares), 15 (fill circles) and 30 (open squares) at 25.0 °C. The data were fitted using Eq. 7.

Deduction of Eq. 4

$$[PTFA]_i = [PTFA]_o \cdot [AOT] \cdot K_o$$

$$[PTFA]_w = [PTFA]_i \cdot W \cdot Kw = [PTFA]_o \cdot W \cdot Kw \cdot K_o \cdot [AOT]$$

$$[PTFA]_t = [PTFA]_o + [PTFA]_i + [PTFA]_w$$

$$[PTFA]_t = [PTFA]_o + [PTFA]_o \cdot K_o \cdot [AOT] + [PTFA]_o \cdot W \cdot Kw \cdot K_o \cdot [AOT] =$$

$$= [PTFA]_o \{1 + [AOT] \cdot K_o + W \cdot Kw \cdot K_o \cdot [AOT]\}$$

$$[PTFA]_o = \frac{[PTFA]_t}{1 + K_o \cdot [AOT] + W \cdot Kw \cdot K_o \cdot [AOT]}$$

$$-\frac{\partial PTFA}{\partial t} = ki \cdot [PTFA]_i + kw \cdot [PTFA]_w$$

$$= ki \cdot \{[AOT] \cdot [PTFA]_o \cdot K_o\} + kw \cdot \{[PTFA]_o \cdot W \cdot Kw \cdot K_o \cdot [AOT]\}$$

$$= [PTFA]_o [AOT] \cdot (ki \cdot K_o + kw \cdot W \cdot Kw \cdot K_o)$$

$$-\frac{\partial PTFA}{\partial t} = \frac{[PTFA]_t \cdot [AOT] \cdot (ki \cdot K_o + kw \cdot W \cdot Kw \cdot K_o)}{1 + K_o \cdot [AOT] + W \cdot Kw \cdot K_o \cdot [AOT]}$$

$$k_{obs} = \frac{[AOT] \cdot (ki \cdot K_o + kw \cdot W \cdot Kw \cdot K_o)}{1 + K_o \cdot [AOT] + W \cdot Kw \cdot K_o \cdot [AOT]}$$

**Table S1.** Values of slope from plots of  $k_{\text{obs}}$  vs.  $W$  (Figure 3) at different [AOT] for hydrolysis of PTFA in AOT/*n*-heptane RMs at 25 °C.

| [AOT], M | <i>slope</i> <sub><i>k-W</i></sub> ,<br>10 <sup>-4</sup> min <sup>-1</sup> | Ordinate,<br>10 <sup>-3</sup> min <sup>-1</sup> |
|----------|----------------------------------------------------------------------------|-------------------------------------------------|
| 0.1      | 3.87                                                                       | -(0.3±0.2)                                      |
| 0.2      | 7.6                                                                        | -(0.7±0.4)                                      |
| 0.3      | 13                                                                         | -(0.9±0.9)                                      |
| 0.4      | 17.4                                                                       | -(3±2)                                          |
| 0.5      | 21.4                                                                       | -(3±1)                                          |

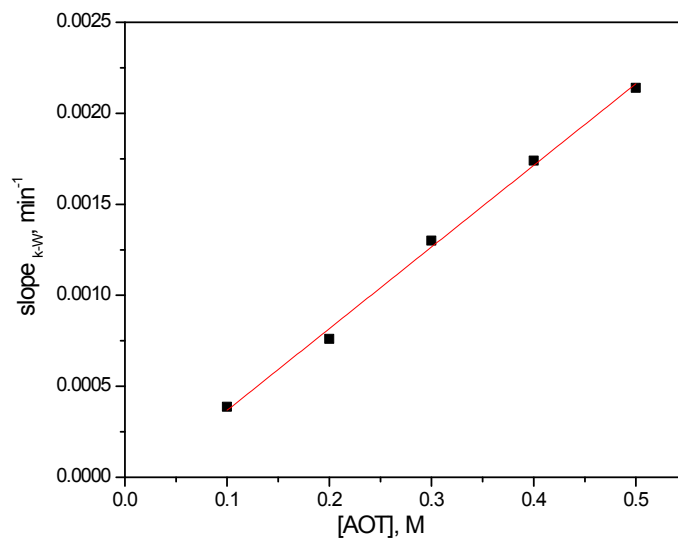

**Figure S3.** Plot of *slope*<sub>*k-W*</sub> vs. [AOT] for hydrolysis PTFA in AOT/*n*-heptane RMs at 25 °C ( $r^2=0.996$ ); The parameter of the straight line are slope=  $(4.5 \pm 0.1) \times 10^{-3} \text{ min}^{-1}$  and intercept=  $-(8 \pm 5) \times 10^{-5} \text{ min}^{-1}$ .
